# Supplementary material for: Efficient electrocatalysts for biomass quasi-solid-state Li–O2 batteries: porous nanocages with nickel–cobalt-N/C active species
Source: Royal Society of Chemistry journal article supplement (doi:10.1039/d4ce00756e), 2024-01-01
Supplement: d4ce00756e1.pdf [file d4ce00756e1.pdf]

## Supporting information (SI)

# Efficient electrocatalysts for biomass quasi-solid-state Li-O<sub>2</sub> batteries: porous nanocages with nickel-cobalt-N/C active species

Tie Liu, \*<sup>a</sup> Guangwei Zhang <sup>a</sup>

*<sup>a</sup> School of Chemistry and Chemical Engineering, Heze University, Heze 274015, China. E-mail: lime1032@163.com*

## Experimental section

### Materials preparation

Typically, cobalt (II) nitrate hexahydrate (2 mmol) was dissolved ultrasonically in 50 mL of methanol to form a clear purple solution. Next, 50 mL of methanol containing 2-Methylimidazole (2-MeIM, 8 mmol) was added dropwise into the solution above under mild stirring treatment. After continuing stirring for 20 min, the resulting solution was transferred and kept at 25 °C for 24 hours. The ZIF-67 nanoparticles were then collected by symmetric centrifugation, washed with methanol several times to remove the excess ions and residues, and dried at 80 °C under vacuum. As for the carbonization, the solid-precursor was kept under an Ar atmosphere for 5 min in a furnace before elevating the temperature, then performed the carbonization at 750 °C for 3 h with a heating rate of

5 °C min<sup>-1</sup>. Finally, after washed with 0.5 M H<sub>2</sub>SO<sub>4</sub> solution to remove unstable metal species, a fine black powder (the CNC sample) was obtained after drying at 60 °C under vacuum.

## Characterization

The TG studies were carried out using a NETZSCH TG 209F1 thermogravimetric analyzer.

The crystal structure was characterized by X-ray diffraction (XRD, Bruker D8 Advance X-ray diffractometer) with high-intensity Cu-K $\alpha$  radiation ( $\lambda=0.15406$  nm). Scanning electron microscopy (FESEM, Hitachi S-4800, Hitachi Corp., Japan) and transmission electron microscopy (TEM, JEM-2100F) were used to observe the morphology. X-ray photoelectron spectroscopy (XPS) analysis was performed with an RBD-equipped PHI-5000C ESCA system (Perkin-Elmer Co., USA) using monochromatic Al K $\alpha$  radiation ( $h\nu = 1486.6$  eV). Raman spectra were recorded using a Raman spectrometer (InVia Reflex, Renishaw Corp., UK) coupled to a microscope in reflection mode with a 633 nm excitation laser source. The specific surface area was evaluated using the Brunauer-Emmett-Teller equation (BET) on a Tristar 3020 instrument (Micromeritics Corp., USA) at the temperature of liquid nitrogen. The pore size distribution was investigated using the Barrett-Joyner-Halenda (BJH) method derived from the desorption isotherm.

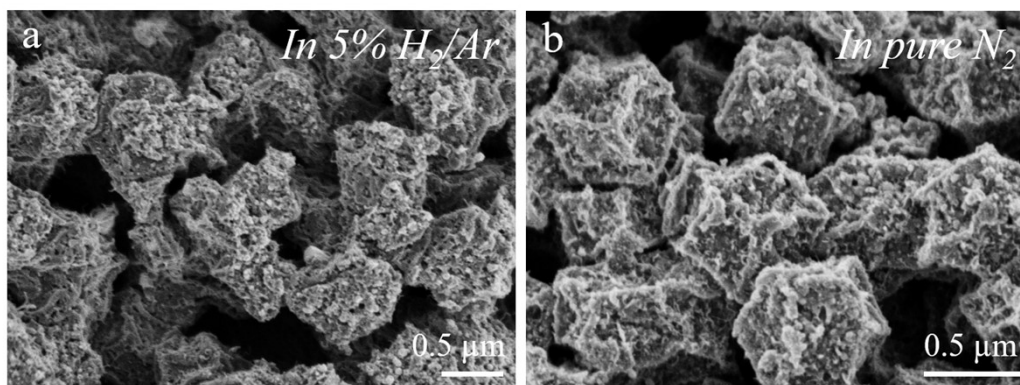

**Fig. S1** SEM images of NC-ZIFs after annealing in (a) 5% H<sub>2</sub>/Ar mixed atmosphere and (b) pure N<sub>2</sub> atmosphere.

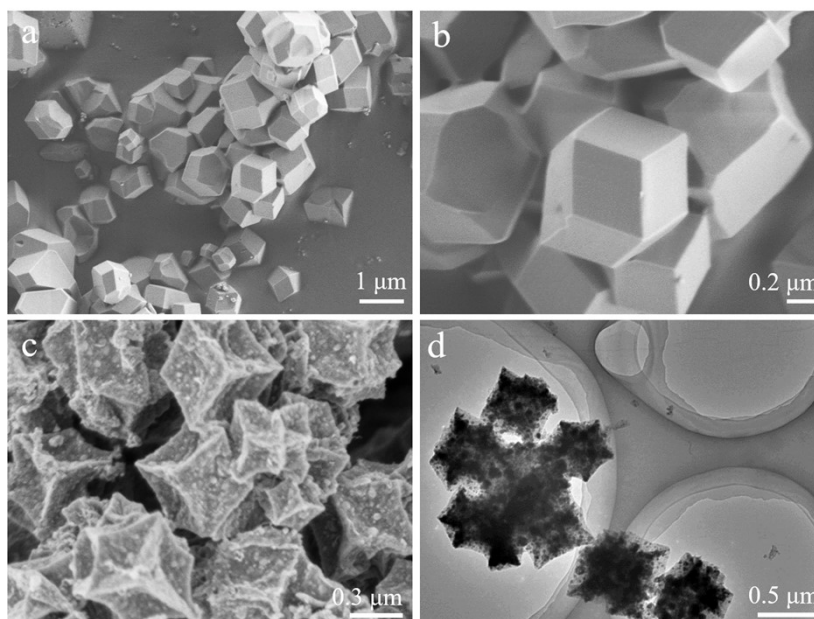

**Fig. S2** (a) Low- and (b) high-magnified FESEM images of ZIF-67; (c) FESEM image and (d) low TEM image of CNC sample, respectively.

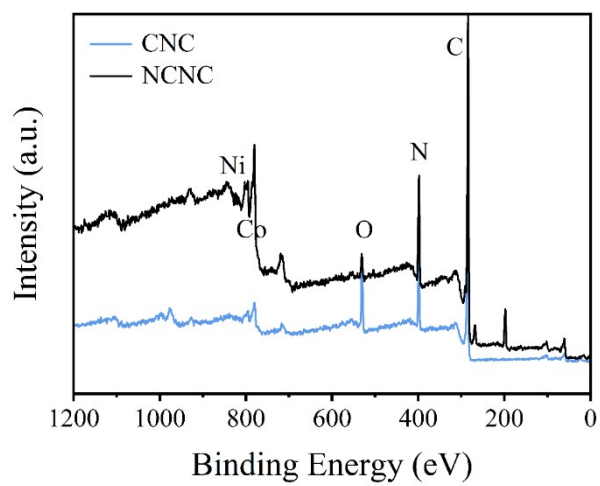

**Fig. S3** The XPS survey spectrum of NCNC and CNC catalysts.

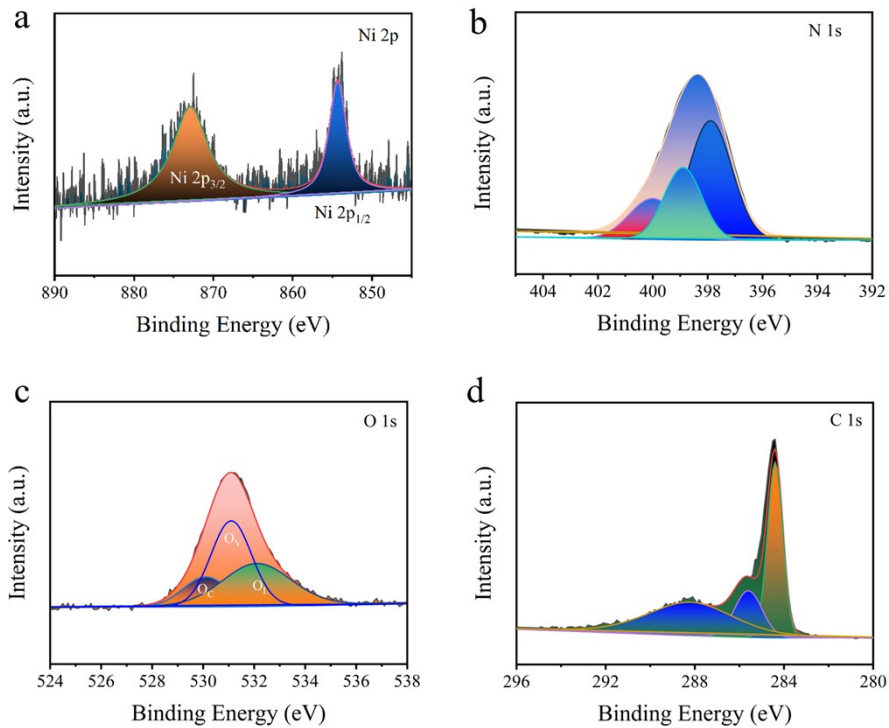

**Fig. S4** The high-resolution XPS spectra of (a) Ni 2p, (b) N 1s, (c) O 1s and (d) C 1s in NCNC catalyst, respectively.

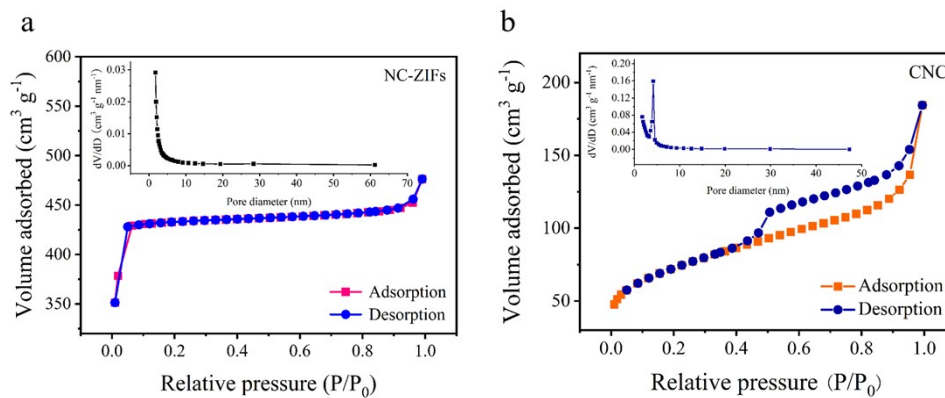

**Fig. S5** N<sub>2</sub> adsorption–desorption isotherms and pore-size distribution of (a) NC-ZIFs and (b) CNC sample, respectively.

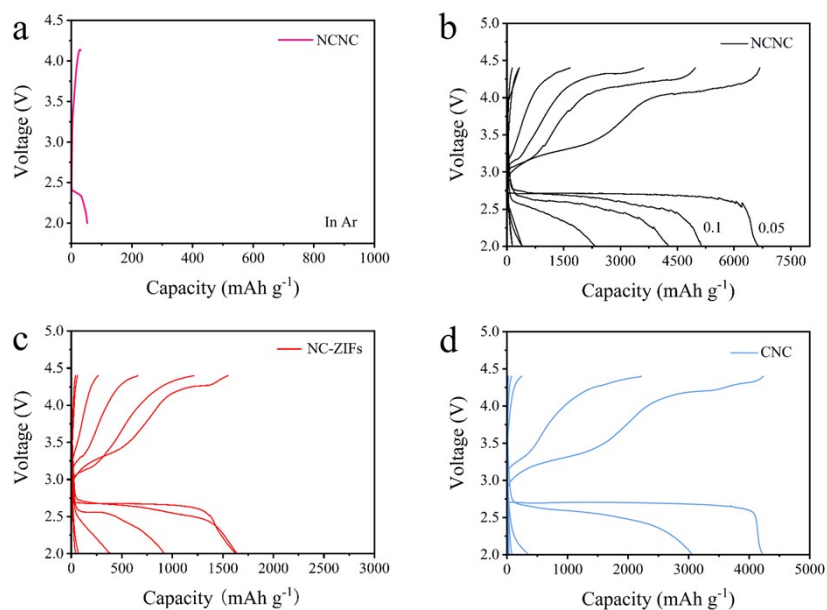

**Fig. S6** (a) the discharge-charge profiles at  $0.05 \text{ mA cm}^{-2}$  of NCNC cathode-based cell in pure Ar; the rate performance of the discussed cathodes from  $0.05 \text{ mA cm}^{-2}$  to  $0.5 \text{ mA cm}^{-2}$ : (b) NCNC, (c) NC-ZIFs, and (d) CNC cathodes.

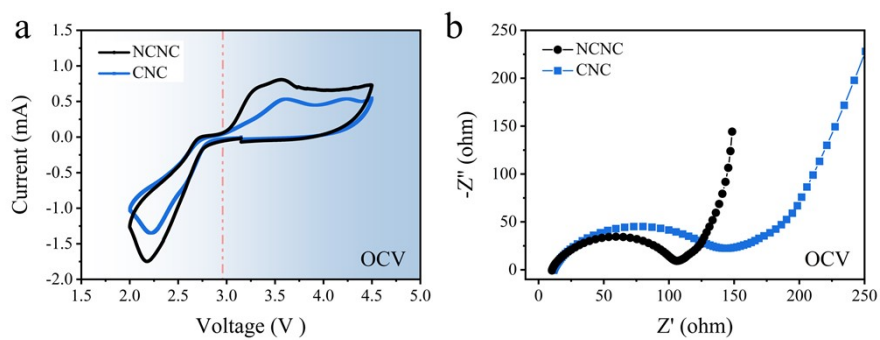

**Fig. S7** Electrochemical performance of NCNC and CNC cathodes. (a) CV curves at a scan rate of  $0.5 \text{ mV/s}$  and (b) Nyquist plots of the NCNC electrode (in black) and CNC electrode (in blue) before discharge.

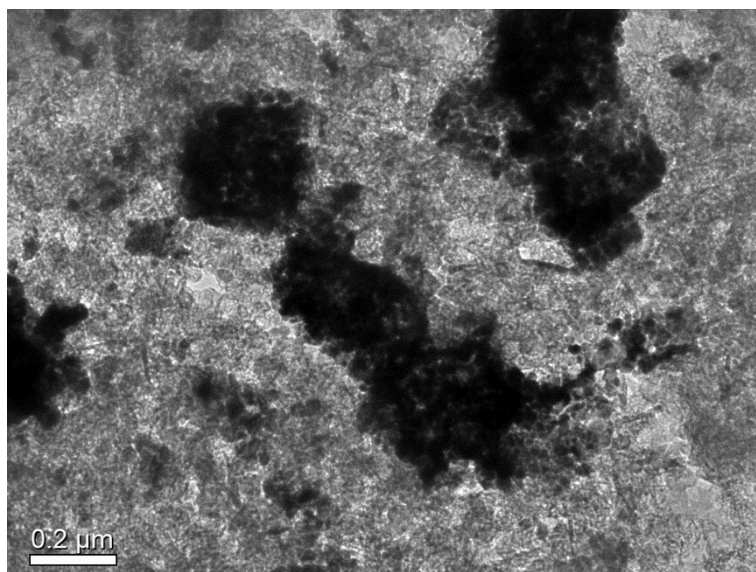

**Fig. S8** The TEM image of NCNC cathode after full discharge
